# Supplementary material for: Mutations in two global regulators lower individual mortality in Escherichia coli
Source: PubMed Central journal article supplement (PMC2229837; doi:10.1111/j.1365-2958.2007.05988.x), 2007-11-25
Supplement: mmi0067-0002-SD1.pdf [file mmi0067-0002-SD1.pdf]

**Table S1: Mutants isolated from the qualitative screen.** Ten mutants were isolated and identified as having less dead cells than WT on solid media. The mutant name represents the position of the mutant in the ordered library. Tn10 insertion locations were determined by arbitrary PCR and sequencing (see materials and methods). The functions of the genes affected by the Tn10 insertion are from the SWISSPROT database. ND= not determined.

| <b>Mutant name</b> | <b>Tn10 insertion (location)</b>   | <b>Function of gene affected by Tn10 insertion</b>               | <b>Ratio percentage of dead cells WT/mutant In LB 30°C</b> | <b>Ratio percentage of dead cells WT/mutant in MM 30°C</b> |
|--------------------|------------------------------------|------------------------------------------------------------------|------------------------------------------------------------|------------------------------------------------------------|
| 44D3               | <i>rssB</i><br>27'79               | negative regulator of $\sigma^S$                                 | 3.3 (+/- 0.03)                                             | 3.7 (+/- 0.04)                                             |
| 46E3               | <i>znuC</i> ,<br><i>znuB</i> 41'84 | high affinity ABC transport system for Zn                        | ND                                                         | ND                                                         |
| 47B3               | <i>yiaT</i><br>80'81               | potential outer membrane protein (similar to <i>mipA</i> family) | ND                                                         | ND                                                         |
| 47E4               | <i>b2881</i><br>65'08              | unknown function                                                 | 1.64 (+/- 0.04)                                            | 1.90 (+/- 0.03)                                            |
| 48H10              | <i>yhaB</i><br>70'39               | unknown function                                                 | 1.12 (+/- 0.02)                                            | 1.95 (+/- 0.14)                                            |
| 59H8               | <i>yieC</i><br>84'03               | potential outer membrane protein (similar to <i>lamB</i> family) | 0.92 (+/- 0.02)                                            | 1.49 (+/- 0.07)                                            |
| 65D2               | <i>yjdK</i><br>93'77               | unknown function                                                 | 2.21 (+/- 0.03)                                            | 1.88 (+/- 0.15)                                            |
| 64D10              | <i>yfdV</i><br>53.61               | potential inner membrane protein                                 | 1.08 (+/- 0.08)                                            | 1.27 (+/ 0.15)                                             |
| 66G11              | <i>ykgG</i><br>6'                  | unknown function                                                 | 1.32 (+/- 0.06)                                            | 1.3 (+/- 0.3)                                              |
| 70B5               | <i>fliA</i><br>43'09               | $\sigma^F$ (motility and flagellar synthesis)                    | 2.5 (+/- 0.04)                                             | 6.5 (+/- 0.02)                                             |

**Table S2: Strains used in this study.** All strains are derived from *E. coli* K-12 (MG1655).

| Strain name | Relevant genotype                                                                                                     | Source/ reference             |
|-------------|-----------------------------------------------------------------------------------------------------------------------|-------------------------------|
| NEC283      | $\Delta fliA$ FRT                                                                                                     | This work                     |
| NEC284      | $\Delta flhD$ FRT                                                                                                     | This work                     |
| NEC285      | $\Delta flgM$ FRT                                                                                                     | This work                     |
| NEC286      | $\Delta fliC$ FRT                                                                                                     | This work                     |
| NEC287      | $\Delta flgJ$ FRT                                                                                                     | Allele from Keio collection   |
| NEC288      | $\Delta motA$ FRT                                                                                                     | Allele from Keio collection   |
| NEC289      | <i>motA448</i> <i>zea</i> ::Tn10                                                                                      | (Samuel and Berg, 1996)       |
| NEC290      | $\Delta rssB$ FRT                                                                                                     | This work                     |
| NEC291      | <i>rpoS</i> ::Tn10                                                                                                    | (Bjedov <i>et al.</i> , 2003) |
| NEC292      | $\Delta rssB$ <i>rpoS</i> ::Tn10                                                                                      | This work                     |
| NEC293      | $\Delta fliA$ FRT $\Delta rssB$ FRT                                                                                   | This work                     |
| NEC294      | <i>rpsL</i> ( <i>StrepR</i> )                                                                                         | (Giraud <i>et al.</i> , 2001) |
| NEC295      | $\Delta fliA$ <i>rpsL</i>                                                                                             | This work                     |
| NEC296      | $\Delta rssB$ <i>rpsL</i>                                                                                             | This work                     |
| NEC297      | <i>gyrA</i> ( <i>nalR</i> )                                                                                           | (Giraud <i>et al.</i> , 2001) |
| NEC298      | $\Delta fliA$ FRT <i>gyrA</i>                                                                                         | This work                     |
| NEC299      | $\Delta rssB$ FRT <i>gyrA</i>                                                                                         | This work                     |
| NEC300      | <i>ypdA</i> :: <i>Patet</i> -GFP <sup>++</sup>                                                                        | This work                     |
| NEC301      | $\Delta fliA$ <i>ypdA</i> :: <i>Patet</i> -GFP <sup>++</sup>                                                          | This work                     |
| NEC302      | $\Delta rssB$ <i>ypdA</i> :: <i>Patet</i> -GFP <sup>++</sup>                                                          | This work                     |
| NEC303      | <i>Patet</i> -mRFP                                                                                                    | This work                     |
| NEC304      | $\Delta fliA$ <i>ypdA</i> :: <i>Patet</i> -mRFP                                                                       | This work                     |
| NEC305      | $\Delta rssB$ <i>ypdA</i> :: <i>Patet</i> -mRFP                                                                       | This work                     |
| NEC306      | <i>PibpAB</i> -mRFP ; <i>intC</i> :: <i>P2rrnB</i> -CFP <sup>++</sup> ; <i>PyiaG</i> -YFP <sup>++</sup>               | This work                     |
| NEC307      | $\Delta rssB$ <i>PibpAB</i> -mRFP ; <i>intC</i> :: <i>P2rrnB</i> -CFP <sup>++</sup> ; <i>PyiaG</i> -YFP <sup>++</sup> | This work                     |
| NEC308      | $\Delta fliA$ <i>PibpAB</i> -mRFP ; <i>intC</i> - <i>P2rrnB</i> ::CFP <sup>++</sup> ; <i>PyiaG</i> -YFP <sup>++</sup> | This work                     |

**Table S3: Primers used in this study.** Underlined portions of the primers for deletion correspond to the sequence for Cm cassette amplification.

| Primer name           | Sequences (5'-3')                                                             |
|-----------------------|-------------------------------------------------------------------------------|
| <i>rssB</i> delfor    | atgacgcagccattggtcggaaaacagattctcattggt <u>ggtgtaggctggagctgcttc</u>          |
| <i>rssB</i> delback   | tcattctgcagacaacatcaagcgcagtcgaccaccgggt <u>catatgaatatcctccttag</u>          |
| <i>rssB</i> checkfor  | gcagtcgtaacccaatttc                                                           |
| <i>rssB</i> checkback | ggcaacatcctggttctta                                                           |
| <i>fliA</i> delfor    | actcctggtagtcaaagttaaagtgcggcatttactgacg <u>gtgtaggctggagctgcttc</u>          |
| <i>fliA</i> delback   | taatcatgccgataactcatataacgcagggctgtttatc <u>catatgaatatcctccttag</u>          |
| <i>fliA</i> checkfor  | aacaactccggctacatctt                                                          |
| <i>fliA</i> checkback | gcttatcaggcctacaagt                                                           |
| <i>flgM</i> delfor    | cagtactctgcaagtcttgctgctgcttgatcagcgcacgcgc <u>gtgtaggctggagctgcttc</u>       |
| <i>flgM</i> delback   | gagtattgatcgcacttcgctctgaagcctgtaagcaccgttcaaccgc <u>catatgaatatcctccttag</u> |
| <i>flgM</i> checkfor  | tgaacctggcgctttattggtc                                                        |
| <i>flgM</i> checkback | gcgctaaggctcatctggtat                                                         |
| <i>flhD</i> delfor    | caggcccttttctgcgagcgccttctcaggctgattaacatc <u>gtgtaggctggagctgcttc</u>        |
| <i>flhD</i> delback   | gtgggaataatgcatactccgagttgctgaaacac <u>catatgaatatcctccttag</u>               |
| <i>flhD</i> checkfor  | caaacgccggaagtgagtc                                                           |
| <i>flhD</i> checkback | caaccggtagcaccaga                                                             |
| <i>fliC</i> up        | atggcacaagtcattaataccaacagcctctcgctgatca <u>tgtgtaggctggagctgcttc</u>         |
| <i>fliC</i> dwn       | ttaaccctgcagcagagacagaacctgctgcggtacctgg <u>catatgaatatcctccttag</u>          |
| <i>fliC</i> checkfor  | cctgacccgactcccagc                                                            |
| <i>fliC</i> checkback | tcggacgattagtgggtg                                                            |
| ARB1                  | ggccacgcgtcgactagttacNNNNNNNNNNgat                                            |
| ARB2                  | ggccacgcgtcgacttagttac                                                        |
| ARB6                  | ggccacgcgtcgactagttacNNNNNNNNNNacgcc                                          |
| Tn10ext               | tggaaggaacgtcaattccc                                                          |
| Tn10int               | ccattgctgttgacaaaggg                                                          |

## References

- Bjedov, I., Tenaillon, O., Gerard, B., Souza, V., Denamur, E., Radman, M., Taddei, F., and Matic, I. (2003) Stress-induced mutagenesis in bacteria. *Science* **300**: 1404-1409.
- Giraud, A., Matic, I., Tenaillon, O., Clara, A., Radman, M., Fons, M., and Taddei, F. (2001) Costs and benefits of high mutation rates: adaptive evolution of bacteria in the mouse gut. *Science* **291**: 2606-2608.
- Samuel, A.D., and Berg, H.C. (1996) Torque-generating units of the bacterial flagellar motor step independently. *Biophys J* **71**: 918-923.
